# Supplementary material
Source: PubMed Central journal article supplement (PMC5278832)
Supplement: Supp_Fig1.pdf [file Supp_Fig1.pdf]

## Supplementary Data

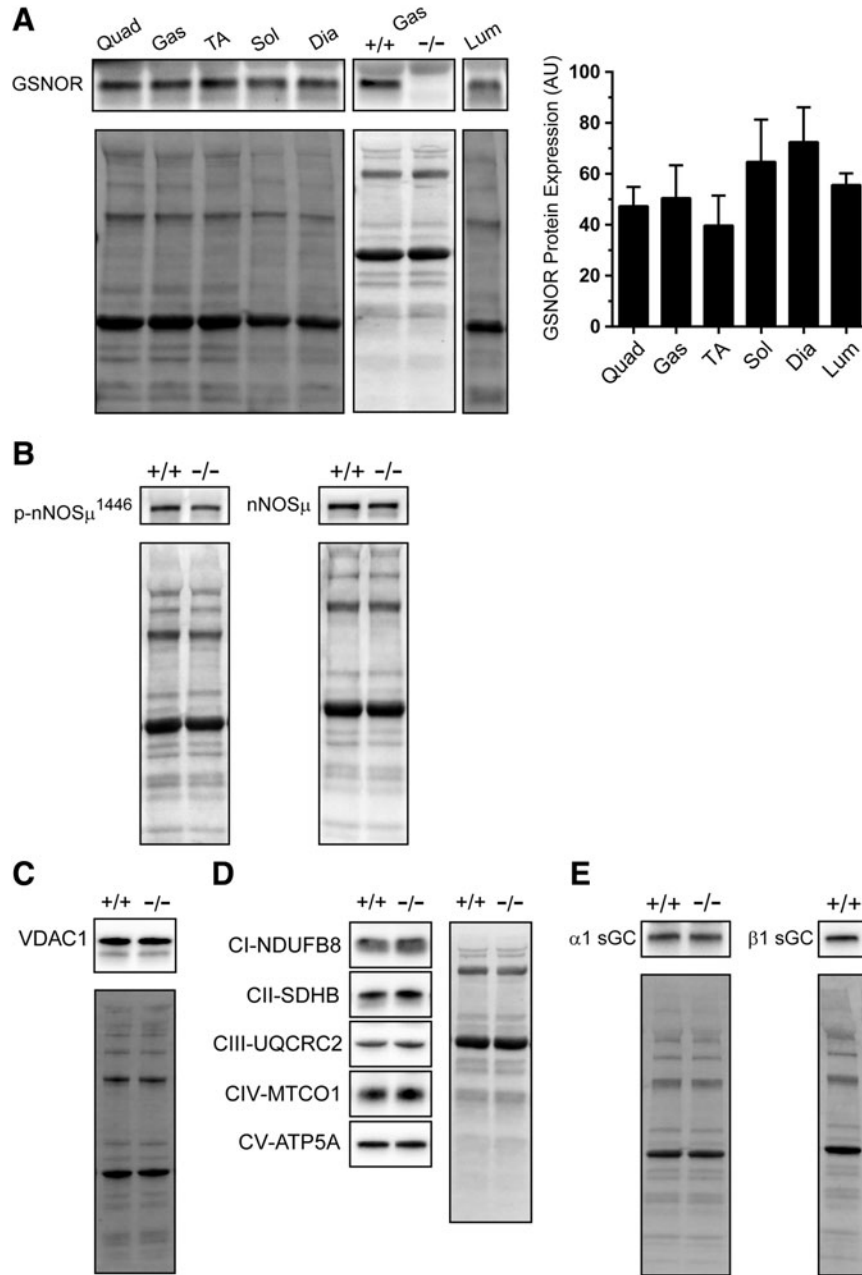

**SUPPLEMENTARY FIG. S1. GSNOR protein expression profiling in skeletal muscle and protein loading controls for Western blots.** The Western blots from Figures 1, 3, 5, and 6 have been reproduced here for ease of comparison. Thirty micrograms of skeletal muscle protein was loaded per lane, with proteins visualized on PVDF membrane using the Stain-Free™ system (Biorad). **(A)** The *bottom panels* show total protein loading for the Western blots of GSNOR protein (*top panels*) in Figure 1A. The graph shows densitometric analysis of GSNOR protein expression in different skeletal muscles. **(B)** Protein loading controls for phospho-nNOS $\mu^{ser1446}$  (*bottom left panel*) and nNOS $\mu$  expression (*bottom right panel*) in Figure 3F, G. **(C)** Protein loading control (*bottom panel*) for Figure 5B (*top panel*). **(D)** Protein loading control (*right panel*) for Figure 5C (*left panels*). **(E)** Protein loading controls for Figure 6B. Loading control (*bottom left panel*) for the  $\alpha 1$  sGC subunit Western blot (*top left panel*) is shown. Loading control (*bottom right panel*) for the  $\beta 1$  sGC subunit Western blot (*top right panel*) is shown. Quad, quadriceps; Gas, gastrocnemius; TA, tibialis anterior; Sol, soleus; Dia, diaphragm; Lum, lumbrical; GSNOR, S-nitrosoglutathione reductase.
