# Supplementary material
Source: PubMed Central journal article supplement (PMC5278832)
Supplement: Supp_Table1.pdf [file Supp_Table1.pdf]

SUPPLEMENTARY TABLE S1. BODY AND SKELETAL MUSCLE MASSES

|                                                    | <i>Wild type</i>            | <i>GSNOR<sup>-/-</sup></i>   | <i>Significance</i> |
|----------------------------------------------------|-----------------------------|------------------------------|---------------------|
| Body mass (g)                                      | 35 ± 1.3 ( <i>n</i> = 17)   | 28.6 ± 1.2 ( <i>n</i> = 17)  | ***                 |
| Tibialis anterior mass (mg)                        | 55.7 ± 0.9 ( <i>n</i> = 13) | 43.3 ± 1.6 ( <i>n</i> = 13)  | ****                |
| Body mass normalized tibialis anterior mass (mg/g) | 1.5 ± 0.06 ( <i>n</i> = 11) | 1.49 ± 0.06 ( <i>n</i> = 11) | n.s.                |
| Soleus mass (mg)                                   | 10.5 ± 0.3 ( <i>n</i> = 6)  | 8.7 ± 0.3 ( <i>n</i> = 6)    | **                  |
| Body mass normalized soleus mass (mg/g)            | 0.35 ± 0.01 ( <i>n</i> = 6) | 0.33 ± 0.02 ( <i>n</i> = 6)  | n.s.                |

6 month-old male mice.

\*\*\*\**p* < 0.0001.

\*\*\**p* < 0.001.

\*\**p* < 0.01.

n.s., not significantly different.

*p* values obtained using Student's unpaired *t*-test.
