# Supplementary material
Source: PubMed Central journal article supplement (PMC5278832)
Supplement: Supp_Table2.pdf [file Supp_Table2.pdf]

SUPPLEMENTARY TABLE S2. PRIMER SEQUENCES

| <i>Gene</i>   | <i>Sequence accession number</i> | <i>Primer</i> | <i>Sequence (5' → 3')</i>          | <i>Assay design</i> | <i>Product size (bp)</i> | <i>Reference</i>     |
|---------------|----------------------------------|---------------|------------------------------------|---------------------|--------------------------|----------------------|
| Atrogin1      | NM_026346                        | Forward       | AAAGGGCAGCTGGATTGGAA               | Intron-spanning     | 179                      | Present study        |
|               |                                  | Reverse       | TGAGGGGAAAGTGAGACGGA               |                     |                          |                      |
| HIF1 $\alpha$ | NM_010431                        | Forward       | TCAAGTCAGCAACGTGGAAG               | Intron-spanning     | 198                      | (1)                  |
|               |                                  | Reverse       | TATCGAGGCTGTGTCCGACTG              |                     |                          |                      |
| MuRF1         | NM_001039048                     | Forward       | GTCTGGAGGTCGTTTCCGTT               | Intron-spanning     | 224                      | Present study        |
|               |                                  | Reverse       | AGCAAGTAGGCACCTCACAC               |                     |                          |                      |
| PGC1 $\alpha$ | NM_008904                        | Forward       | Unique Assay ID:<br>qMmuCID0006032 | Intron-spanning     | 103                      | Bio-Rad<br>Prime PCR |
|               |                                  | & Reverse     |                                    |                     |                          |                      |
| Rps18         | NM_011296                        | Forward       | ACAACAAGCTGCGTGAGGAC               | Intron-spanning     | 160                      | Present study        |
|               |                                  | Reverse       | GGCCAGAGACTCATTTCTTC               |                     |                          |                      |
