# Supplementary material
Source: PubMed Central journal article supplement (PMC5278832)
Supplement: Supp_Table3.pdf [file Supp_Table3.pdf]

SUPPLEMENTARY TABLE S3. QUANTITATIVE POLYMERASE CHAIN REACTION VALIDATION

| <i>Gene</i>   | <i>Melt temperature<br/>(<math>T_m</math> °C)</i> | <i>Standard<br/>curve slope</i> | <i>Amplification<br/>efficiency (%)</i> | $R^2$ | <i>Standard<br/>curve Y intercept</i> |
|---------------|---------------------------------------------------|---------------------------------|-----------------------------------------|-------|---------------------------------------|
| Atrogin1      | 86                                                | -3.415                          | 96.2                                    | 0.998 | 18.607                                |
| HIF1 $\alpha$ | 83                                                | -3.006                          | 115.1                                   | 0.996 | 23.274                                |
| MuRF1         | 87.5                                              | -3.294                          | 101.2                                   | 0.999 | 20.670                                |
| PGC1 $\alpha$ | 79                                                | -3.435                          | 95.5                                    | 0.987 | 21.282                                |
| Rps18         | 88                                                | -3.435                          | 95.5                                    | 0.999 | 16.311                                |

Melt-curve analysis revealed a single specific product at the temperature for all primers listed. Standard curves generated by plotting Cq values against different template concentrations (undiluted, 10-, 100-, 1000-, and 100,000-fold dilutions) were used to calculate amplification efficiencies. The slope, y-intercept, and  $R^2$  value of the regression line for the standard curves are shown. Percentage amplification efficiency was calculated using  $(E-1) \times 100\%$ , where  $E = 10^{-1/\text{slope}}$ .
